# Supplementary material for: Pathway Analysis Reveals Common Pro-Survival Mechanisms of Metyrapone and Carbenoxolone after Traumatic Brain Injury
Source: PLOS journal article supplement (doi:10.1371/journal.pone.0053230), 2013-01-09
Supplement: S11 (10.1371/journal.pone.0053230.s011) [file journal.pone.0053230.s011]

Cytoplasm

Extracellular space

Up  
Down

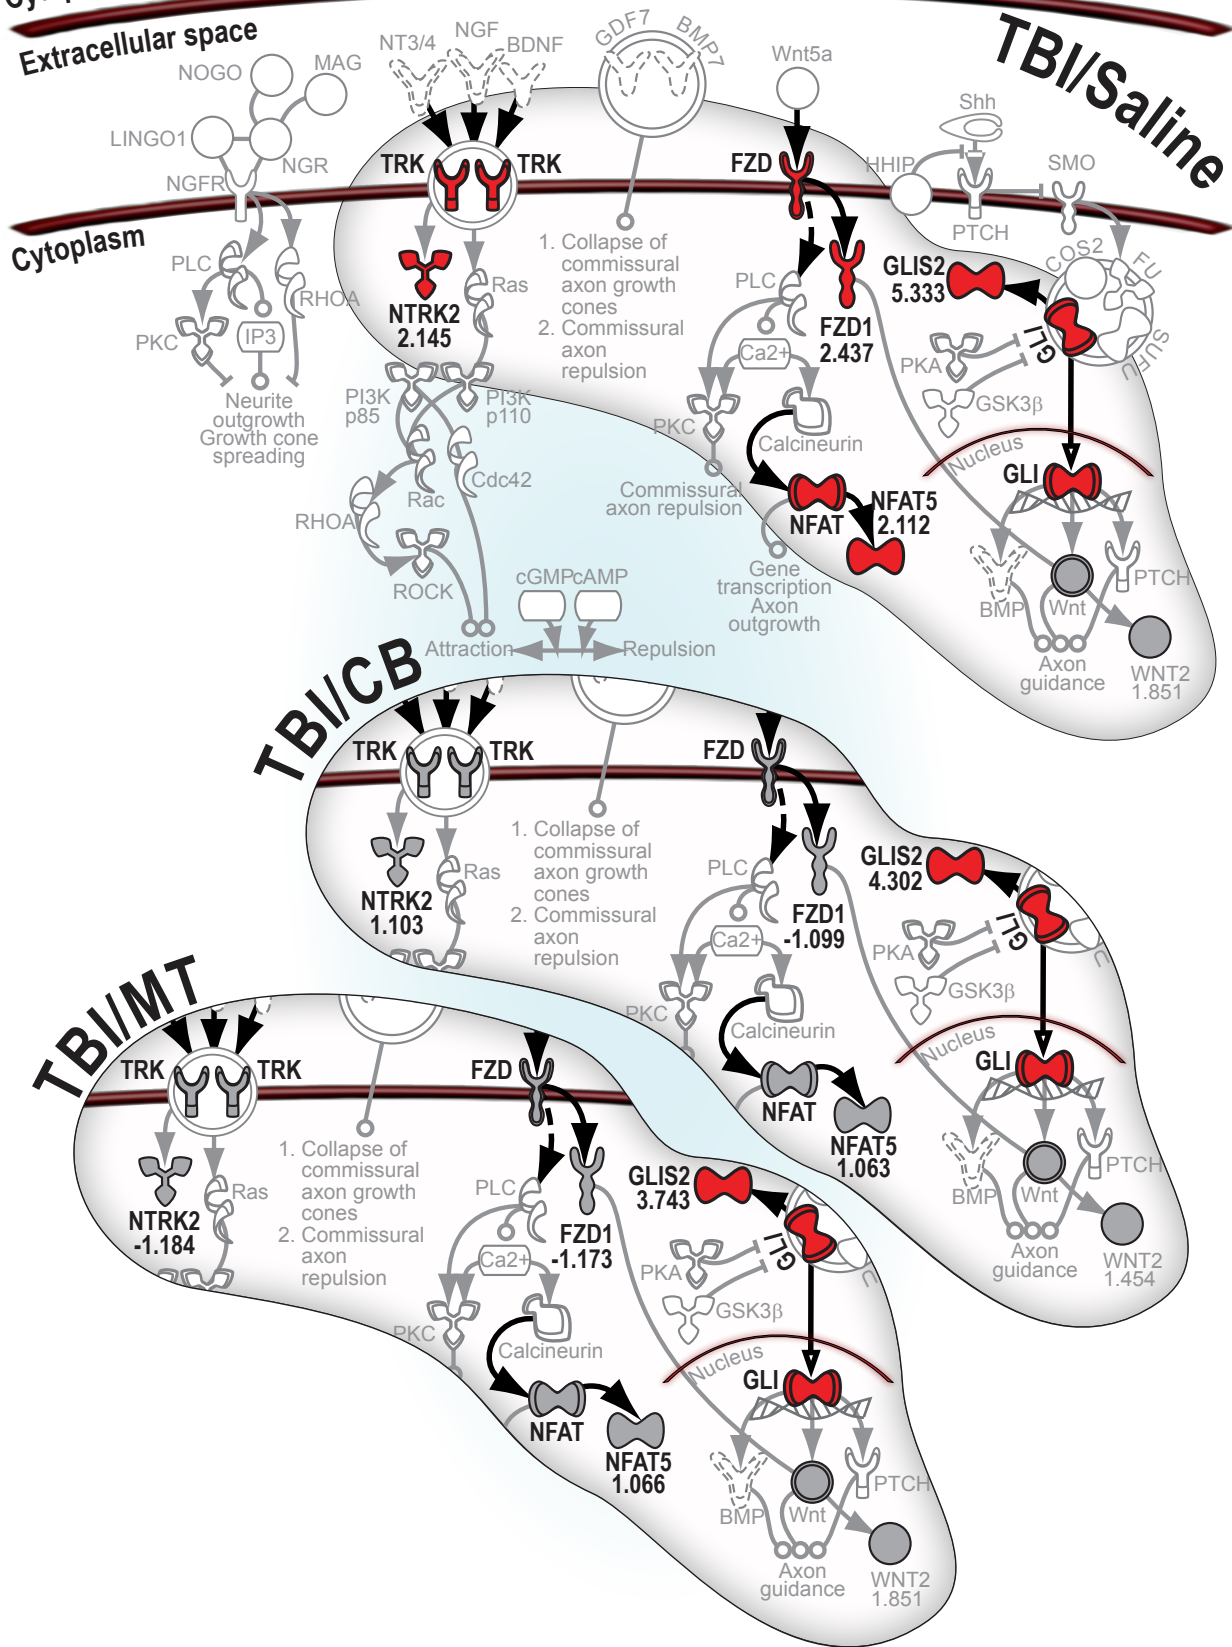

NFAT5<sup>S38</sup> Nuclear factor of activated T-cells 5

NFAT<sup>S39,S40</sup> Nuclear factor of activated T-cells
