# Supplementary material for: Pathway Analysis Reveals Common Pro-Survival Mechanisms of Metyrapone and Carbenoxolone after Traumatic Brain Injury
Source: PLOS journal article supplement (doi:10.1371/journal.pone.0053230), 2013-01-09
Supplement: S15 (10.1371/journal.pone.0053230.s015) [file journal.pone.0053230.s015]

## Supporting References

### Pathway analysis reveals common pro-survival mechanisms of metyrapone and carbenoxolone after traumatic brain injury

**Helen L. Hellmich\***

**Daniel R. Rojo**

**Maria-Adelaide Micci**

**Stacy L. Sell**

**Deborah R. Boone**

**Jeanna M. Crookshanks**

**Douglas S. DeWitt**

**Brent E. Masel**

**Donald S. Prough**

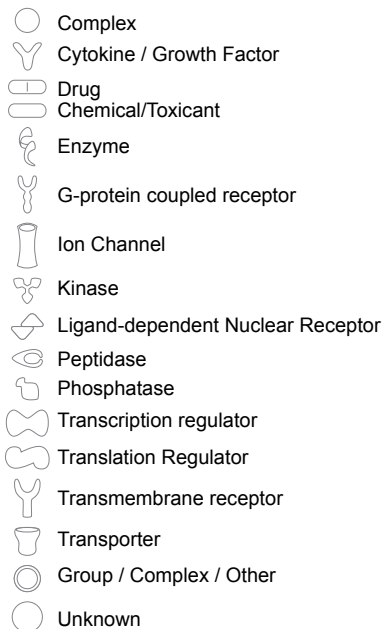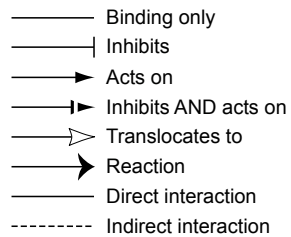

Note: "Acts on" and "inhibits" edges may also include a binding event.
