# Supplementary material for: Pathway Analysis Reveals Common Pro-Survival Mechanisms of Metyrapone and Carbenoxolone after Traumatic Brain Injury
Source: PLOS journal article supplement (doi:10.1371/journal.pone.0053230), 2013-01-09
Supplement: S18 (10.1371/journal.pone.0053230.s018) [file journal.pone.0053230.s018]

**Table S3. Top significant pathways of interest with biological relevance**

| Pathways/Functions of Interest | Top Pathways With Biological Relevance                                         |
|--------------------------------|--------------------------------------------------------------------------------|
| Cell Survival Pathways         | Protein Ubiquitination                                                         |
| Apoptosis Signaling            | Hypoxia Signaling in the Cardiovascular System                                 |
| Death Receptor Signaling       | TWEAK Signaling                                                                |
| Amyloid Receptor Signaling     | Corticotrophin Releasing Hormone Signaling                                     |
| Inflammation                   | Death Receptor Signaling                                                       |
| Oxidative Stress               | Role of Macrophages, Fibroblasts and Endothelial Cells in Rheumatoid Arthritis |
| Synaptic Plasticity            | Axonal Guidance Signaling                                                      |
| Development                    | Apoptosis Signaling                                                            |
| Neurogenesis                   | Glycerophospholipid Metabolism                                                 |
|                                | IL-10 Signaling                                                                |
|                                | TNFR1 Signaling                                                                |
|                                | Protein Kinase A Signaling                                                     |

Pathways associated with cell survival or death are identified through IPA
